# Supplementary material for: High second-order nonlinear response of platinum nanoflowers: the role of surface corrugation
Source: Royal Society of Chemistry journal article supplement (doi:10.1039/c5nr07571h), 2016-01-01
Supplement: c5nr07571h1.pdf [file c5nr07571h1.pdf]

**Supporting Information**

**High second-order nonlinear response of platinum nanoflowers: the role of surface corrugation**

*Hoang Minh Ngo, Ngoc Diep Lai and Isabelle Ledoux-Rak\**

*Laboratoire de Photonique Quantique et Moléculaire, UMR 8537, Ecole Normale Supérieure de Cachan, CentraleSupélec, CNRS, Université Paris-Saclay, 94235 Cachan, France.*

**Table S1** The recalculated  $\beta$  and  $\beta'$  values inferred from data by Galletto et al.<sup>15</sup> in AuNSs using their reported  $\beta$  values per nanoparticle corrected (i) from correct  $\beta_{H2O}$  values (0.055 instead of  $0.56 \times 10^{-30}$  esu)<sup>11</sup> and (ii) using Eq. 2.

| Gold colloid | Diameter (nm) | $\beta$ per particle ( $\beta$ )<br>( $\times 10^{-26}$ esu) | $\beta$ per Au atom ( $\beta'$ )<br>( $\times 10^{-30}$ esu) | Surface area (nm <sup>2</sup> ) |
|--------------|---------------|--------------------------------------------------------------|--------------------------------------------------------------|---------------------------------|
| a            | 4.9           | 0.6                                                          | 100                                                          | 80                              |
| b            | 8.6           | 2.0                                                          | 143                                                          | 230                             |
| c            | 19.0          | 13.1                                                         | 286                                                          | 1130                            |
| d            | 22.0          | 16.6                                                         | 291                                                          | 1520                            |
